# Supplementary material
Source: publisher figshare collection journal article supplement (https://frontiersin.figshare.com/ndownloader/files/14353076)
Supplement: Supplementary file 1 [file 14353076]

## Supplementary Material

In an ongoing study, we identify the impact of recent changes in temperature and precipitation across wetlands in the Mediterranean basin. For this study we used a dataset of 236 wetland sites which is described in detail in the MWO2 and its geographical distribution is described in Figure S1.

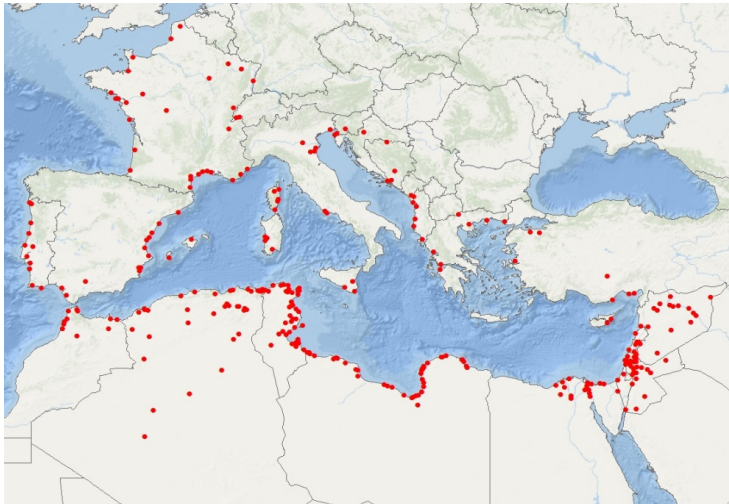

Figure S1 Geographical distribution of the 236 sites

For each site we obtained data related to the changes in precipitation and temperature from 1990 until 2005 from Krager et al. (2017). Figure 2 of the paper presents how the 236 are distributed over these two gradients of change. It shows that 50% of the studied wetlands experienced a temperature increase above 0.6°C reaching a maximum of 1.1°C, and 70.6% of the sites experienced a decreasing precipitation

In addition to climate variables, we identified how much surface of each site had a protection status such as Natura 2000, National Park or Ramsar. Protection status data comes open access data bases such as the database of MedPAN on Marine Protected Areas (<http://medpan.org/marine-protected-areas/mediterranean-mpas/>) and the World Database on Protected Areas (<https://protectedplanet.net/>), complemented with verification and corrections by experts of specific sites. We distinguished three classes: "high protection coverage" indicating that more than 50% of the total surface area of a site has a protection status; "low protection coverage" indicating that less or equal to 50% the total surface area of a site has a protection status; and "no protection coverage". From the 236 studied sites, 119 (50%) have a relatively high surface with a protection status while for 78 (33%) no protection status of a surface area could be found. In figure 2 in the paper this protection status is indicated in colors, demonstrating that the sites that are least protected also experienced the highest increases in temperature.

## References

- Karger, D.N., Conrad, O., Böhner, J., Kawohl, T., Kreft, H., Soria-Auza, R.W., et al., 2017 Data from: Climatologies at high resolution for the earth's land surface areas. Dryad Digital Repository, 2017. <https://doi.org/10.5061/dryad.kd1d4>.
- Mediterranean Wetland Observatory (2018). *Mediterranean Wetland Outlook 2: Solutions for sustainable Mediterranean Wetlands*. Tour du Valat: Geijzendorffer I.R, Chazée L., Gaget E., Galewski T., Guelmami A. and Perennou C. Available at: <https://tourduvalat.org/en/actualites-en/press-release-extreme-climatic-events-biodiversity-loss-what-if-wetlands-were-part-of-the-solution/>.
